# Supplementary material for: A retrospective study on molecular epidemiology trends of carbapenem resistant Enterobacteriaceae in a teaching hospital in Malaysia
Source: PeerJ journal article supplement (doi:10.7717/peerj.12830), 2022-02-22
Supplement: S1-S3.pdf [file S1-S3.pdf]

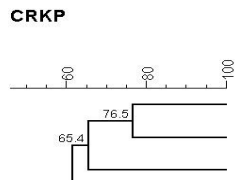

**CRKP**

| Sample   | Ward    | Date       | MHT | Carbapenemase | Porin      | Pulsotype    |
|----------|---------|------------|-----|---------------|------------|--------------|
| CRKP 170 | 13UA    | 16/10/2015 | -   | NDM           | 35, 36, 37 | <i>Xba11</i> |
| CRKP B4  | 7PA     | 21/2/2014  | -   | -             | 35, 37     | <i>Xba12</i> |
| CRKP 12  | 9SB     | 17/11/2014 | +   | NDM           | 35, 36, 37 | <i>Xba13</i> |
| CRKP 37  | NA      | NA         | +   | OXA 48        | 35, 36     |              |
| CRKP 27  | ICU     | 2/1/2015   | +   | NDM           | 35, 36, 37 |              |
| CRKP 67  | 7U      | 1/3/2015   | +   | NDM, OXA 48   | 35, 36, 37 |              |
| CRKP 129 | ICU     | 1/7/2015   | +   | OXA 48        | 35, 36, 37 |              |
| CRKP 152 | ICU     | 1/9/2015   | +   | OXA 48        | 35, 36, 37 |              |
| CRKP 26  | 8TD     | 2/1/2015   | +   | NDM, OXA 48   | 35, 36, 37 |              |
| CRKP 68  | ICU     | 2/3/2015   | +   | NDM           | 35, 36, 37 |              |
| CRKP 69  | 13UA    | 3/3/2015   | +   | NDM, OXA 48   | 35, 36, 37 |              |
| CRKP 44  | 6U      | 4/2/2015   | +   | OXA 48        | 35, 36, 37 |              |
| CRKP 99  | UROLOGI | 6/4/2015   | +   | OXA 48        | 35, 36, 37 |              |
| CRKP 157 | ICU     | 6/9/2015   | +   | NDM, OXA 48   | 35, 36, 37 |              |
| CRKP 120 | T2      | 7/6/2015   | -   | NDM           | 35, 36, 37 |              |
| CRKP 111 | ICU     | 8/5/2015   | +   | NDM, OXA 48   | 35, 36, 37 |              |
| CRKP 78  | ICU     | 8/3/2015   | +   | NDM           | 35, 36, 37 |              |
| CRKP 46  | 6TD     | 8/2/2015   | +   | OXA 48        | 35, 36, 37 |              |
| CRKP 47  | ICU     | 8/2/2015   | +   | NDM, OXA 48   | 35, 36, 37 |              |
| CRKP 74  | ICU     | 8/3/2015   | +   | NDM, OXA 48   | 35, 36, 37 |              |
| CRKP 29  | 9SB     | 8/1/2015   | +   | OXA 48        | 35, 36, 37 |              |
| CRKP 50  | ICU     | 9/2/2015   | +   | NDM, OXA 48   | 35, 36, 37 |              |
| CRKP 131 | 7U      | 9/7/2015   | +   | OXA 48        | 35, 36, 37 |              |
| CRKP 93  | 12U     | 12/3/2015  | +   | OXA 48        | 35, 36, 37 |              |
| CRKP 49  | 7U      | 13/2/2015  | +   | NDM, OXA 48   | 35, 36, 37 |              |
| CRKP 63  | 11UA    | 13/2/2015  | +   | OXA 48        | 35, 36, 37 |              |
| CRKP 59  | ICU     | 14/2/2015  | +   | OXA 48        | 35, 36, 37 |              |
| CRKP 134 | ICU     | 14/7/2015  | +   | OXA 48        | 35, 36, 37 |              |
| CRKP B3  | 7U      | 15/2/2014  | +   | OXA           | 35, 37     | <i>Xba14</i> |
| CRKP B1  | ICU     | 15/1/2014  | +   | NDM           | 35, 36, 37 |              |
| CRKP 86  | 6TD     | 15/3/2015  | +   | OXA 48        | 35, 36, 37 |              |
| CRKP 56  | ICU     | 16/2/2015  | +   | NDM, OXA 48   | 35, 36, 37 |              |
| CRKP 102 | 7U      | 16/4/2015  | +   | OXA 48        | 35, 36     |              |
| CRKP 53  | ICU     | 16/2/2015  | +   | NDM, OXA 48   | 35, 36, 37 |              |
| CRKP 16  | 5UB     | 16/12/2014 | +   | OXA 48        | 35, 36     |              |
| CRKP 115 | 6TD     | 17/5/2015  | +   | OXA 48        | 35, 36, 37 |              |
| CRKP 90  | 10U     | 17/3/2015  | +   | OXA 48        | 35, 36, 37 |              |
| CRKP 150 | 7U      | 17/8/2015  | +   | OXA 48        | 35, 36, 37 |              |
| CRKP 135 | PICU    | 17/7/2015  | +   | NDM           | 35, 36, 37 |              |
| CRKP 123 | ICU     | 17/6/2015  | +   | OXA 48        | 35, 36, 37 |              |
| CRKP 104 | T1      | 17/4/2015  | +   | OXA 48        | 35, 36     |              |
| CRKP 91  | PICU    | 17/3/2015  | +   | OXA 48        | 35, 36, 37 |              |
| CRKP 87  | ICU     | 17/3/2015  | +   | OXA 48        | 35, 36, 37 |              |
| CRKP 145 | 7U      | 18/8/2015  | +   | OXA 48        | 35, 36, 37 |              |
| CRKP 165 | ICU     | 18/10/2015 | +   | OXA 48        | 35, 36, 37 |              |
| CRKP 124 | T2      | 18/6/2015  | +   | NDM           | 35, 36, 37 |              |
| CRKP 39  | ICU     | 19/1/2015  | +   | OXA 48        | 35, 36     |              |
| CRKP 34  | ICU     | 19/1/2015  | +   | OXA 48        | 35, 36, 37 |              |
| CRKP 60  | 6TE     | 20/2/2015  | +   | OXA 48        | 35, 36, 37 |              |
| CRKP 41  | 7PA     | 20/1/2015  | -   | OXA 48        | 35, 36     |              |
| CRKP B10 | UROLOGI | 20/4/2014  | +   | OXA 48        | 35, 36, 37 |              |
| CRKP 62  | 6U      | 21/2/2015  | +   | OXA 48        | 35, 36, 37 |              |
| CRKP 113 | 8TD     | 22/5/2015  | +   | OXA 48        | 35, 36, 37 |              |

Cluster I

61.4

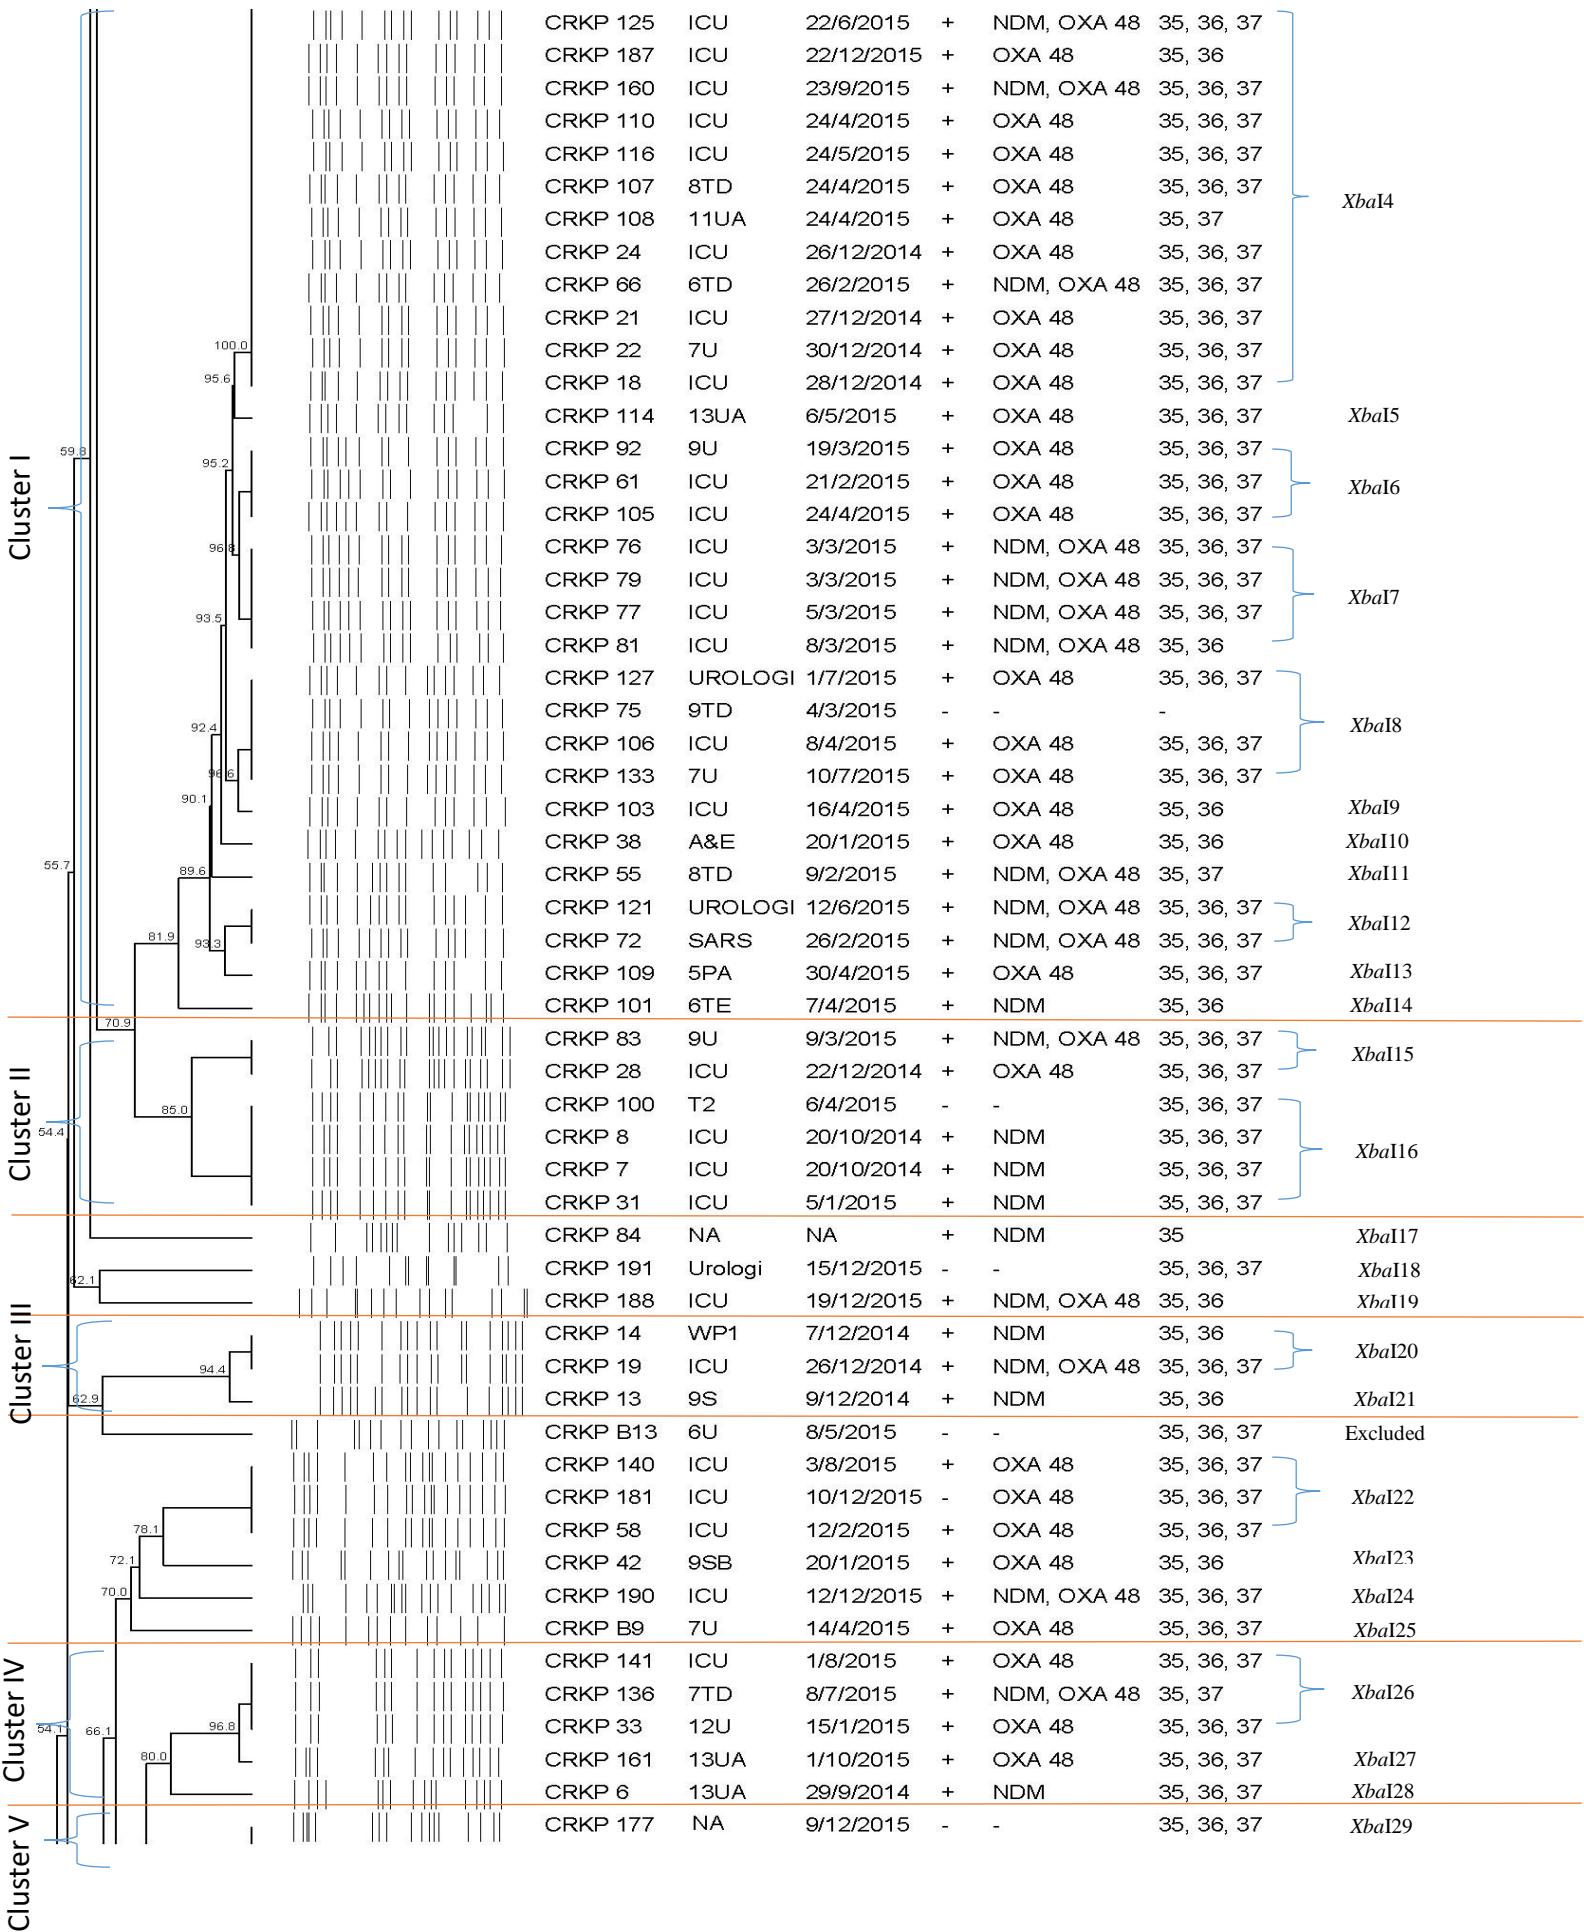

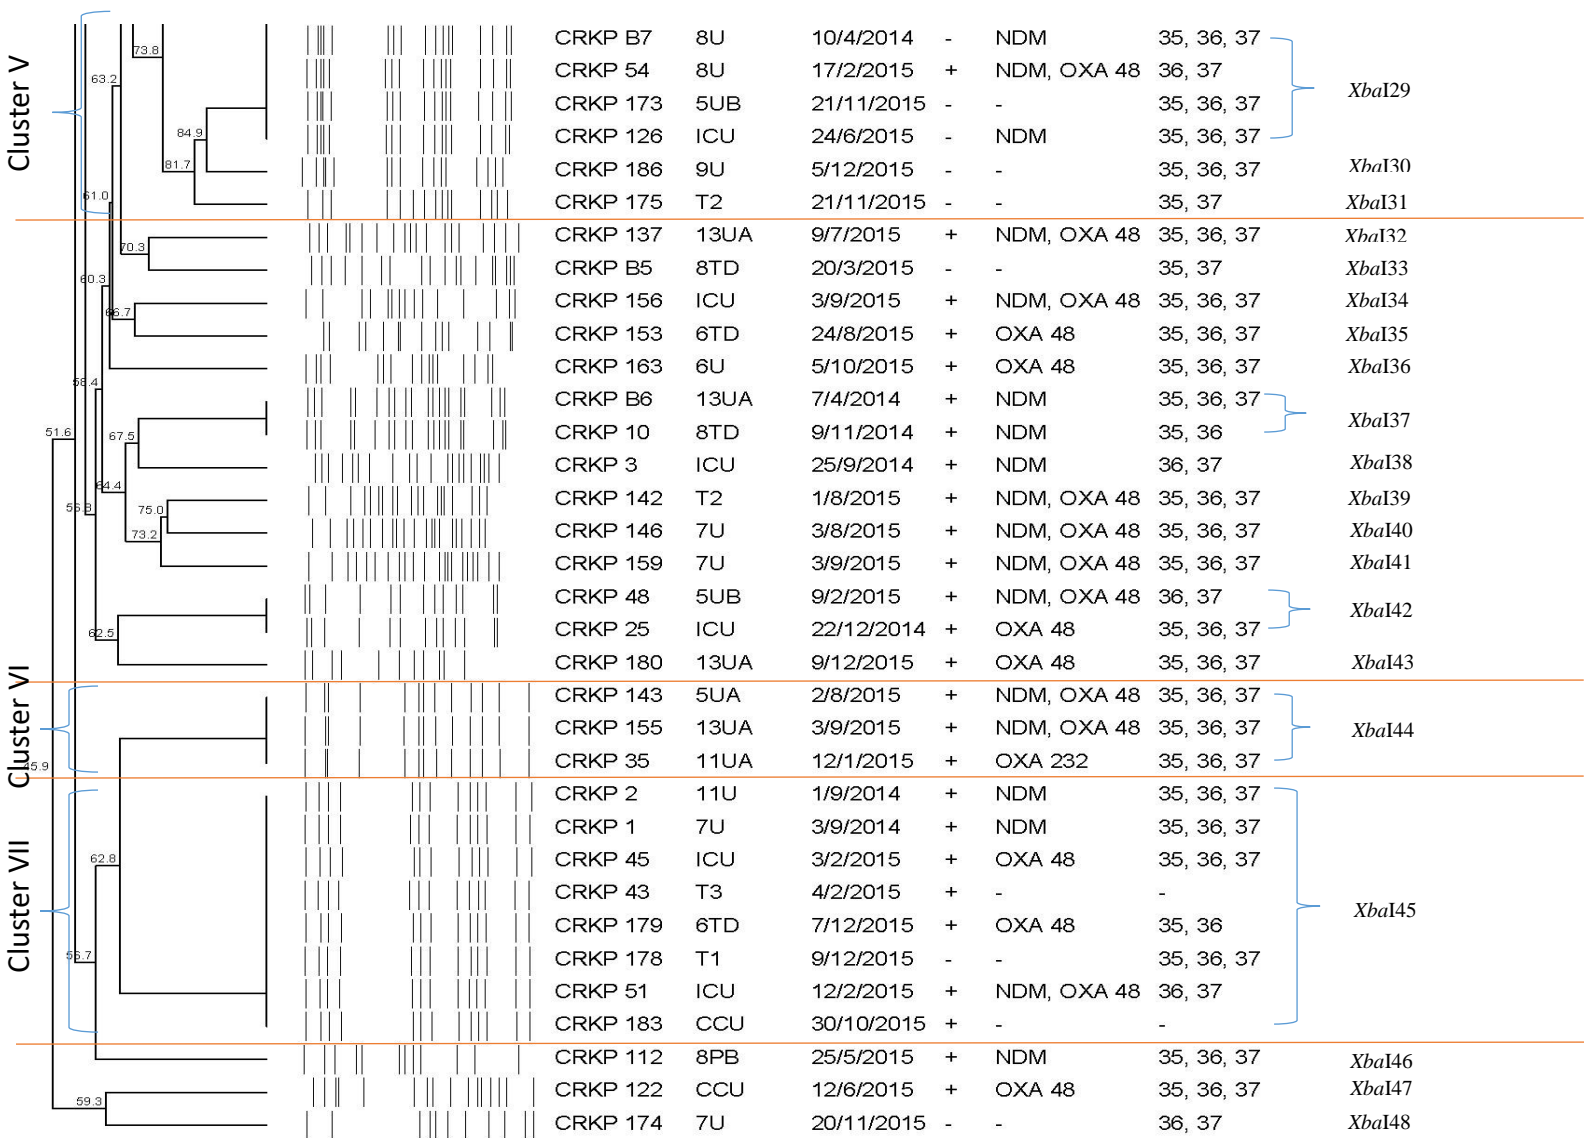

S1-S3: Dendrogram generated by UPGMA clustering method using Dice coefficient.
