# Supplementary material for: A retrospective study on molecular epidemiology trends of carbapenem resistant Enterobacteriaceae in a teaching hospital in Malaysia
Source: PeerJ. 2022 Feb 22;10:e12830. doi: 10.7717/peerj.12830 (PMC8877335; doi:10.7717/peerj.12830)
Supplement: Supplemental Information 2 [file peerj-10-12830-s002.xlsx]

## Sheet: Sheet1
Sample	Date of isolation	Source	Organism	Carbapenemase presence	Porins presence	Imipenem MIC (µg/mL )	Meropenem MIC (µg/mL )	Colistin MIC (µg/mL )	Age	Gender	Ethnicity	Length of hospitalization (days)	Underlying Disorder	Invasive device/procedure prior to CRE isolation	ICU stay	Colonization/infection	Period between isolation and appropriate therapy for infection cases	Clinical outcome
1	2014-09-03	Urine	Klebsiella pneumoniae	NDM	35, 36, 37	64	128	0.5	81	Male	Chinese	26	Maglinacy	Yes	Yes	Colonization	NA	Alive
2	2014-09-01	Sputum	Klebsiella pneumoniae	NDM	35, 36, 37	16	0.25	0.5	79	Male	Chinese	7	HPT, ESRF/kidney disease, prostate disease	Yes	Yes	Colonization	NA	Dead
3	2014-09-25	Bronchoalveolar fluid	Klebsiella pneumoniae	NDM	36, 37	16	64	0.5	55	Male	Indian	17	DM, maglinancy	Yes	Yes	Infection	≤3	Dead
4	2014-09-15	Bronchoalveolar fluid	Klebsiella oxytoca	NDM	36	16	32	1	10	Male	Malay	87	Maglinancy	Yes	Yes	Colonization	NA	Dead
5	2014-09-18	Pleural fluid	Klebsiella oxytoca	NDM	36	2	0.125	1	39	Female	Indian	49	Respiratory disease, pleural effusion	Yes	Yes	Colonization	NA	Alive
6	2014-09-29	Urine	Klebsiella pneumoniae	NDM	35, 36, 37	64	128	0.5	89	Female	Chinese	35	HPT, DM, brain disease	Yes	No	Colonization	NA	Alive
7	2014-10-09	Tracheal secretion	Klebsiella pneumoniae	NDM	35, 36, 37	64	128	0.5	28	Male	Indian	102	Heart disease, bowel dislocation	Yes	Yes	Colonization	NA	Alive
8	2014-10-10	Bronchoalveolar fluid	Klebsiella pneumoniae	NDM	35, 36, 37	128	128	0.5	46	Male	Indian	24	No	Yes	Yes	Colonization	NA	Alive
9	2014-10-25	Urine	Enterobacter cloacae	NDM	NA	32	32	0.5	18	Female	Malay	48	No	Yes	Yes	Infection	>3	Alive
10	2014-11-09	Tip swab	Klebsiella pneumoniae	NDM	35, 36	2	0.125	0.5	67	Male	Malay	20	HPT, DM, ESRF/kidney disease, endocrine/metabolite disease	Yes	Yes	Infection	≤3	Alive
12	2014-11-17	Tracheal secretion	Klebsiella pneumoniae	NDM	35, 36, 37	16	64	1	75	Male	Chinese	46	DM, HPT, ESRF/kidney disease, heart disease	Yes	Yes	Infection	>3	Dead
13	2014-12-09	Urine	Klebsiella pneumoniae	NDM	35, 36	128	256	0.5	NA	NA	NA	NA	NA	NA	NA	NA	NA	NA
14	2014-12-07	Blood	Klebsiella pneumoniae	NDM	35, 36	64	128	0.5	42	Male	Indian	40	Endocrine/metabolite disease	Yes	Yes	Colonization	NA	Alive
16	2014-12-16	Tracheal secretion	Klebsiella pneumoniae	OXA 48	35, 36	4	2	2	NA	NA	NA	NA	NA	NA	NA	NA	NA	NA
18	2014-12-28	Wound swab	Klebsiella pneumoniae	OXA 48	35, 36, 37	4	16	1	22	Male	Malay	81	No	Yes	Yes	Infection	≤3	Alive
19	2014-12-26	Peritoneal slough swab	Klebsiella pneumoniae	OXA 48, NDM	35, 36, 37	16	128	0.5	65	Female	Malay	94	Respiratory disease, maglinancy	Yes	Yes	Colonization	NA	Alive
20	2014-12-28	Wound swab	Citrobacter freundii	OXA 48	NA	2	0.5	1	22	Male	Malay	81	No	Yes	Yes	Infection	≤3	Alive
21	2014-12-27	Peritoneal fluid swab	Klebsiella pneumoniae	OXA 48	35, 36, 37	4	1	1	42	Male	Malay	112	Rectal prolapse	Yes	Yes	Colonization	NA	Alive
22	2014-12-30	Blood	Klebsiella pneumoniae	OXA 48	35, 36, 37	2	8	1	58	Male	Indian	29	DM, HPT, ESRF/kideny disease, heart disease	Yes	Yes	Infection	≤3	Dead
24	2014-12-26	Urine	Klebsiella pneumoniae	OXA 48	35, 36, 37	4	16	1	69	Male	Malay	55	HPT, DM	Yes	Yes	Colonization	NA	Alive
25	2014-12-22	Tracheal secretion	Klebsiella pneumoniae	OXA 48	35, 36, 37	2	2	8	69	Male	Indian	47	Respiratory disease	Yes	Yes	Infection	≤3	Dead
26	2015-01-02	Urine	Klebsiella pneumoniae	OXA 48, NDM	35, 36, 37	2	0.125	16	74	Male	Malay	40	HPT, DM, ESRF/kidney disease, skin disease, infection	Yes	No	Colonization	NA	Alive
27	2015-01-02	Tracheal secretion	Klebsiella pneumoniae	NDM	35, 36, 37	0.5	2	0.5	29	Female	Indian	28	DM, HPT, infection, ESRF/kidney disease, brain disease	Yes	Yes	Infection	>3	Dead
28	2015-01-06	Blood	Klebsiella pneumoniae	NDM	35, 36, 37	64	128	0.5	55	Female	Indian	19	ESRF/kidney disease	Yes	No	Infection	≤3	Dead
29	2015-01-08	Blood	Klebsiella pneumoniae	OXA 48	35, 36, 37	1	2	1	72	Female	Indian	14	DM, HPT, brain disease, endocrine/metabolite disease	Yes	No	Infection	>3	Dead
31	2015-01-05	Bronchoalveolar fluid	Klebsiella pneumoniae	NDM	35, 36, 37	0.0625	4	8	42	Female	Indian	37	Infection, liver disease	Yes	Yes	Colonization	NA	Dead
32	2015-01-12	Nasopharyngeal secretion	Escherichia coli	NDM	NA	8	32	0.5	1	Male	Chinese	69	Heart disease	Yes	No	Colonization	NA	Alive
33	2015-01-15	Bronchoalveolar fluid	Klebsiella pneumoniae	OXA 48	35, 36, 37	0.25	2	0.5	63	Male	Malay	53	DM, HPT, maglinancy, gastrointestinal disesae	Yes	No	Infection	>3	Alive
34	2015-01-19	Sputum	Klebsiella pneumoniae	OXA 48	35, 36, 37	4	8	0.5	56	Female	Chinese	64	DM, HPT, urinary/bladder disease	Yes	Yes	Colonization	NA	Alive
35	2015-01-12	Breast swab	Klebsiella pneumoniae	OXA 232	35, 36, 37	0.25	2	0.5	66	Female	Malay	16	DM, HPT, endocrine/metabolite disease, skin disease	Yes	No	Colonization	NA	Alive
36	2015-01-16	Swab	Citrobacter koseri	OXA 232, VIM	NA	8	4	0.5	NA	NA	NA	NA	NA	NA	NA	NA	NA	NA
37	unknown	Blood	Klebsiella pneumoniae	OXA 48	35, 36	4	4	0.5	NA	NA	NA	NA	NA	NA	NA	NA	NA	NA
38	2015-01-20	Urine	Klebsiella pneumoniae	OXA 48	35, 36	0.125	2	0.5	59	Female	Indian	3	HPT, endocrine disease, liver disease	Yes	No	Colonization	NA	Dead
39	2015-01-19	Tracheal secretion	Klebsiella pneumoniae	OXA 48	35, 36	4	32	0.5	NA	NA	NA	NA	NA	NA	NA	NA	NA	NA
41	2015-01-20	Pus swab	Klebsiella pneumoniae	OXA 48	35, 36	4	16	0.5	41	Male	Chinese	23	Gastrointestinal disease	Yes	Yes	Colonization	NA	Alive
42	2015-01-20	Wound swab	Klebsiella pneumoniae	OXA 48	35, 36	16	64	0.5	35	Female	Other	32	Infection	Yes	No	Colonization	NA	Dead
43	2015-02-04	wound swab	Klebsiella pneumoniae	NO GENES DETECTED	NO PORINS DETECTED	0.5	128	0.5	82	Male	Chinese	2	HPT, infection	No	No	Colonization	NA	Alive
44	2015-02-04	Pus swab	Klebsiella pneumoniae	OXA 48	35, 36, 37	4	8	0.5	29	Male	Malay	26	Infection, heart disease	Yes	Yes	Colonization	NA	Alive
45	2015-02-03	Wound swab	Klebsiella pneumoniae	OXA 48	35, 36, 37	2	8	0.5	NA	NA	NA	NA	NA	NA	NA	NA	NA	NA
46	2015-02-08	Swab	Klebsiella pneumoniae	OXA 48	35, 36, 37	4	8	0.5	NA	NA	NA	NA	NA	NA	NA	NA	NA	NA
47	2015-02-09	Tracheal secretion	Klebsiella pneumoniae	OXA 48, NDM	35, 36, 37	32	32	0.5	34	Male	Indian	44	Polytrauma	Yes	Yes	Colonization	NA	Alive
48	2015-02-09	Sputum	Klebsiella pneumoniae	OXA 48, NDM	36, 37	2	4	0.5	63	Female	Chinese	50	HPT, endocrine/metabolite disease, brain disease	Yes	No	Colonization	NA	Alive
49	2015-02-13	Urine	Klebsiella pneumoniae	OXA 48, NDM	35, 36, 37	32	32	0.5	41	Male	Malay	81	Infection	Yes	Yes	Colonization	NA	Alive
50	2015-02-09	Pus swab	Klebsiella pneumoniae	OXA 48, NDM	35, 36, 37	0.0625	8	1	81	Male	Chinese	58	Gastrointestinal disease, infection	Yes	Yes	Colonization	NA	Alive
51	2015-02-12	Pus swab	Klebsiella pneumoniae	OXA 48, NDM	36, 37	16	64	8	49	Male	Indian	17	DM, infection	Yes	Yes	Colonization	NA	Alive
53	2015-02-16	Peritoneal fluid swab	Klebsiella pneumoniae	OXA 48, NDM	35, 36, 37	4	1	0.5	29	Female	Malay	34	Polytrauma, infection	Yes	Yes	Infection	>3	Alive
55	2015-02-09	Sputum	Klebsiella pneumoniae	OXA 48, NDM	35, 37	8	16	0.5	NA	NA	NA	NA	NA	NA	NA	NA	NA	NA
56	2015-02-16	Tracheal secretion	Klebsiella pneumoniae	OXA 48, NDM	35, 36, 37	4	16	0.5	NA	NA	NA	NA	NA	NA	NA	NA	NA	NA
58	2015-02-12	Blood	Klebsiella pneumoniae	OXA 48	35, 36, 37	16	8	64	50	Female	Malay	108	Liver disease, ESRF/kidney disease, infection	Yes	Yes	Infection	>3	Dead
59	2015-02-14	Blood	Klebsiella pneumoniae	OXA 48	35, 36, 37	16	16	0.5	33	Male	Malay	10	Infection, respiratory disease, maglinancy	Yes	Yes	Infection	>3	Dead
60	2015-02-20	Sputum	Klebsiella pneumoniae	OXA 48	35, 36, 37	0.5	16	0.5	70	Male	Chinese	22	Infection, maglinancy	Yes	No	Infection	>3	Dead
61	2015-02-21	Swab	Klebsiella pneumoniae	OXA 48	35, 36, 37	16	16	0.5	65	Female	Chinese	26	DM, HPT, Gastrointestinal disease	Yes	Yes	Infection	>3	Dead
62	2015-02-21	Cyst swab	Klebsiella pneumoniae	OXA 48	35, 36, 37	4	16	0.5	NA	NA	NA	NA	NA	NA	NA	NA	NA	NA
63	2015-02-23	Ear swab	Klebsiella pneumoniae	OXA 48	35, 36, 37	0.25	2	0.5	53	Male	Chinese	47	Neurological disease, infection	Yes	Yes	Infection	>3	Dead
66	2015-02-26	Blood	Klebsiella pneumoniae	OXA 48, NDM	35, 36, 37	16	16	0.5	17	Female	Indian	15	Maglinancy, infection	Yes	Yes	Infection	≤3	Dead
67	2015-03-01	Urine	Klebsiella pneumoniae	OXA 48, NDM	35, 36, 37	16	16	64	83	Male	Chinese	16	HPT, Gastrointestinal disease	Yes	No	Colonization	NA	Dead
68	2015-03-02	Urine	Klebsiella pneumoniae	NDM	35, 36, 37	16	8	0.5	NA	NA	NA	NA	NA	NA	NA	NA	NA	NA
69	2015-03-03	Urine	Klebsiella pneumoniae	OXA 48, NDM	35, 36, 37	16	16	0.5	81	Male	Indian	52	DM, skin disease	Yes	No	Colonization	NA	Alive
72	26/2/2015	Respiratory secretion	Klebsiella pneumoniae	OXA 48, NDM	35, 36, 37	8	2	1	62	Male	Malay	28	DM, HPT, endocrine/metabolite disease, infection, ESRF/kidney disease	Yes	Yes	Colonization	NA	Alive
73	2015-02-28	Blood	Citrobacter freundii	OXA 48, NDM	NA	8	2	1	65	Female	Chinese	26	DM, HPT, Gastrointestinal disease	Yes	Yes	Infection	>3	Dead
74	2015-03-05	Sacral swab	Klebsiella pneumoniae	OXA 48, NDM	35, 36, 37	4	32	0.5	NA	NA	NA	NA	NA	NA	NA	NA	NA	NA
76	2015-03-03	Tracheal secretion	Klebsiella pneumoniae	OXA 48, NDM	35, 36, 37	16	16	0.5	66	Male	Chinese	24	DM, HPT, ESRF/kidney disease	Yes	Yes	Infection	≤3	Alive
77	2015-03-05	Tracheal secretion	Klebsiella pneumoniae	OXA 48, NDM	35, 36, 37	4	16	0.5	54	Female	Malay	20	HPT, DM, ESRF/kidney disease, infection	Yes	Yes	Infection	>3	Dead
78	2015-03-08	Tracheal secretion	Klebsiella pneumoniae	NDM	35, 36, 37	16	16	0.5	64	Female	Indian	19	Infection	Yes	Yes	Colonization	NA	Alive
79	2015-03-03	Tracheal secretion	Klebsiella pneumoniae	OXA 48, NDM	35, 36, 37	16	16	0.5	69	Male	Malay	34	HPT, maglinancy	Yes	Yes	Infection	>3	Dead
80	2015-03-03	Tracheal secretion	Serratia marcescens	OXA 48	NA	32	1	1	69	Male	Malay	34	HPT, maglinancy	Yes	Yes	Infection	>3	Dead
81	2015-03-09	Blood	Klebsiella pneumoniae	OXA 48, NDM	35, 36	64	16	0.5	69	Male	Indian	30	Liver disease , parotitis	Yes	Yes	Infection	≤3	Dead
83	2015-03-09	Bone swab	Klebsiella pneumoniae	OXA 48, NDM	35, 36, 37	8	128	0.5	60	Male	Indian	5	DM, skin disease	no	No	Colonization	NA	Alive
84	unknown	Sacral swab	Klebsiella pneumoniae	NDM	35	2	4	0.5	NA	NA	NA	NA	NA	NA	NA	NA	NA	NA
86	2015-03-15	Blood	Klebsiella pneumoniae	OXA 48	35, 36, 37	32	16	0.5	41	Male	Chinese	19	Maglinancy	Yes	Yes	Infection	>3	Dead
87	2015-03-17	Bronchoalveolar fluid	Klebsiella pneumoniae	OXA 48	35, 36, 37	8	8	0.5	67	Female	Chinese	18	Infection, ESRF/kidney disease	Yes	Yes	Infection	≤3	Alive
89	2015-03-17	Peritoneal fluid swab	Escherichia coli	NO GENES DETECTED	NA	4	0.125	0.5	21	Male	Indian	68	Liver disease, infection	Yes	No	Infection	≤3	Alive
90	2015-03-17	Wound swab	Klebsiella pneumoniae	OXA 48	35, 36, 37	4	8	1	23	Female	Malay	44	DM	Yes	Yes	Colonization	NA	Alive
91	2015-03-17	Chest tube swab	Klebsiella pneumoniae	OXA 48	35, 36, 37	8	32	0.5	NA	NA	NA	NA	NA	NA	NA	NA	NA	NA
92	2015-03-19	Tissue swab	Klebsiella pneumoniae	OXA 48	35, 36, 37	4	8	0.5	73	Male	Malay	76	DM, HPT, tissue disease	Yes	Yes	Infection	>3	Alive
93	2015-03-22	Swab	Klebsiella pneumoniae	OXA 48	35, 36, 37	4	8	0.5	73	Female	Indian	13	DM, HPT, infection, gastrointestinal disease	Yes	No	Colonization	NA	Alive
94	2015-03-23	Tissue swab	Escherichia coli	NO GENES DETECTED	NA	2	0.0625	0.5	51	Male	Chinese	18	DM, HPT, ESRF/kideny disease, liver disease, tissue disease	Yes	No	Colonization	NA	Alive
96	2015-03-26	Cerebrospinal fluid swab	Escherichia coli	NDM	NA	16	32	1	NA	NA	NA	NA	NA	NA	NA	NA	NA	NA
99	2015-04-06	Urine	Klebsiella pneumoniae	OXA 48	35, 36, 37	8	16	0.5	NA	NA	NA	NA	NA	NA	NA	NA	NA	NA
100	2015-04-06	Urine	Klebsiella pneumoniae	NO GENES DETECTED	35, 36, 37	32	128	0.5	86	Female	Chinese	10	DM, infection	Yes	No	Colonization	NA	Alive
101	2015-04-07	Urine	Klebsiella pneumoniae	NDM	35, 36	2	0.0625	0.5	74	Male	Chinese	90	DM, HPT, maglinancy	Yes	No	Infection	≤3	Alive
102	2015-04-16	Wound swab	Klebsiella pneumoniae	OXA 48	35, 36	0.5	2	0.5	45	Female	Chinese	14	Urinanry/bladder disease	Yes	Yes	Colonization	NA	Alive
103	2015-04-16	Bone swab	Klebsiella pneumoniae	OXA 48	35, 36	8	8	0.5	47	Female	Malay	81	Polytrauma, ESRF/kidney disease, infection	Yes	Yes	Colonization	NA	Dead
104	2015-04-17	Blood	Klebsiella pneumoniae	OXA 48	35, 36	4	8	0.5	60	Male	Malay	12	Infection	Yes	No	Infection	>3	Dead
105	2015-04-24	Blood	Klebsiella pneumoniae	OXA 48	35, 36, 37	8	16	0.5	70	Male	Chinese	29	HPT, ESRF/kidney disease, infection, brain disease, heart disease	Yes	Yes	Infection	>3	Dead
106	2015-04-08	Tracheal secretion	Klebsiella pneumoniae	OXA 48	35, 36, 37	4	16	0.5	74	Female	Malay	27	Infection, endocrine/metabolite disease	Yes	Yes	Colonization	NA	Alive
107	2015-04-24	Sputum	Klebsiella pneumoniae	OXA 48	35, 36, 37	8	16	0.5	54	Male	Malay	51	Pleural effusion, ESRF/kideny disease	Yes	No	Colonization	NA	Alive
108	2015-04-24	Sputum	Klebsiella pneumoniae	OXA 48	35, 37	32	16	0.5	24	Female	Other	45	Skin disease	Yes	Yes	Colonization	NA	Alive
109	2015-04-30	Blood	Klebsiella pneumoniae	OXA 48	35, 36, 37	8	8	0.5	14	Male	Chinese	14	Maglinancy	Yes	Yes	Infection	>3	Dead
110	2015-04-24	Urine	Klebsiella pneumoniae	OXA 48	35, 36, 37	16	32	1	67	Female	Malay	79	HPT, infection, blood disease, skin disease	Yes	Yes	Colonization	NA	Dead
111	2015-05-08	Tracheal secretion	Klebsiella pneumoniae	OXA 48, NDM	35, 36, 37	4	0.5	0.5	67	Male	Malay	17	HPT, DM, ESRF/kidney disease, skin disease	Yes	Yes	Infection	>3	Dead
112	2015-05-25	Nasopharyngeal secretion	Klebsiella pneumoniae	NDM	35, 36, 37	16	32	1	NA	NA	NA	NA	NA	NA	NA	NA	NA	NA
113	2013-05-22	Catheter swab	Klebsiella pneumoniae	OXA 48	35, 36, 37	8	32	0.5	NA	NA	NA	NA	NA	NA	NA	NA	NA	NA
114	2015-05-06	Urine	Klebsiella pneumoniae	OXA 48	35, 36, 37	32	16	0.5	80	Male	Other	73	Infection, maglinancy, blood disorder	Yes	Yes	Colonization	NA	Alive
115	2015-05-17	Blood	Klebsiella pneumoniae	OXA 48	35, 36, 37	8	16	0.5	56	Male	Malay	22	Blood disorder, infection	Yes	No	Infection	≤3	Alive
116	2015-05-24	Blood	Klebsiella pneumoniae	OXA 48	35, 36, 37	32	16	0.5	48	Male	Malay	73	DM, HPT, endocrine/metabolite disease, polytrauma, infection	Yes	Yes	Infection	≤3	Alive
117	2015-05-20	Blood	Escherichia coli	OXA 232	NA	2	0.5	0.5	66	Female	Malay	23	DM, HPT, endocrine/metabolite disease , skin disease	Yes	No	Infection	>3	Dead
120	2015-06-07	Blood	Klebsiella pneumoniae (Ertapenem resistant)	NDM	35, 36, 37	0.5	0.5	0.5	NA	NA	NA	NA	NA	NA	NA	NA	NA	NA
121	2015-06-12	Urine	Klebsiella pneumoniae (Ertapenem resistant)	OXA 48, NDM	35, 36, 37	1	0.5	0.5	68	Female	malay	18	DM, HPT, infection, blood disorder	Yes	No	Infection	>3	Dead
122	2015-06-12	Sputum	Klebsiella pneumoniae	OXA 48	35, 36, 37	8	0.5	0.5	81	Male	Malay	37	infection	Yes	Yes	Colonization	NA	Alive
123	2015-06-17	Tracheal secretion	Klebsiella pneumoniae	OXA 48	35, 36, 37	4	1	0.5	NA	NA	NA	NA	NA	NA	NA	NA	NA	NA
124	2015-06-18	Blood	Klebsiella pneumoniae	NDM	35, 36, 37	16	8	0.5	68	Male	Malay	1	Infection, maglinancy	No	No	Colonization	NA	Alive
125	2015-06-29	Blood	Klebsiella pneumoniae	OXA 48, NDM	35, 36, 37	4	0.5	16	58	Male	Chinese	32	DM, HPT, maglinancy	Yes	Yes	Infection	≤3	Dead
126	2015-06-24	Blood	Klebsiella pneumoniae (Ertapenem intermediate)	NDM	35, 36, 37	0.5	0.5	0.5	55	Male	Malay	56	HPT, infection, ESRF/kidney disease, blood disorder	Yes	Yes	Infection	>3	Dead
127	2015-07-01	Urine	Klebsiella pneumoniae	OXA 48	35, 36, 37	2	0.5	0.5	76	Male	Indian	3	no	Yes	No	Colonization	NA	Alive
129	2015-07-01	Tissue swab	Klebsiella pneumoniae	OXA 48	35, 36, 37	4	16	32	51	Female	Other	42	Polytrauma	Yes	Yes	Colonization	NA	Dead
131	2015-07-09	Blood	Klebsiella pneumoniae	OXA 48	35, 36, 37	4	16	1	78	Female	Indian	52	HPT, liver disease	Yes	No	Infection	>3	Alive
132	2015-07-15	Blood	Escherichia coli	OXA 48, NDM	NA	32	64	0.5	75	Male	Chinese	9	DM, HPT, ESRF/kidney disease, bone/joint disease	Yes	No	Infection	>3	Dead
133	2015-07-10	Bile swab	Klebsiella pneumoniae	OXA 48	35, 36, 37	4	16	0.5	73	Male	Indian	34	HPT , maglinancy	Yes	No	Infection	≤3	Alive
134	2015-07-14	Tissue swab	Klebsiella pneumoniae	OXA 48	35, 36, 37	2	1	0.5	45	Male	Malay	99	HPT, bone/joint disease, ESRF/kidney disease, infection	Yes	Yes	Infection	>3	Dead
135	2015-07-17	Groin swab	Klebsiella pneumoniae	NDM	35, 36, 37	32	64	0.5	1	Male	Malay	53	Heart disease	Yes	Yes	Colonization	NA	Alive
136	2015-07-08	Sputum	Klebsiella pneumoniae	OXA 48, NDM	35, 37	64	32	1	83	Male	Indian	44	DM, HPT, maglinancy, infection	Yes	Yes	Colonization	NA	Dead
137	2015-07-09	Sputum	Klebsiella pneumoniae	OXA 48, NDM	35, 36, 37	4	0.5	2	73	Female	Chinese	2	Neurological disease	Yes	No	Infection	>3	Dead
140	2015-08-04	Peritoneal fluid swab	Klebsiella pneumoniae	OXA 48	35, 36, 37	4	2	64	53	Male	Chinese	33	Maglinancy, liver disease, infection	Yes	No	Infection	≤3	Alive
141	2015-08-01	Abdomen fluid swab	Klebsiella pneumoniae	OXA 48	35, 36, 37	128	128	0.5	81	Male	Chinese	32	HPT, liver disease, infection	Yes	Yes	Infection	≤3	Alive
142	2015-08-01	Sputum	Klebsiella pneumoniae	OXA 48, NDM	35, 36, 37	32	32	0.5	76	Male	Malay	22	Infection	Yes	No	Colonization	NA	Dead
143	2015-08-02	Sputum	Klebsiella pneumoniae	OXA 48, NDM	35, 36, 37	8	8	0.5	39	Male	Indian	90	Infection, neurological disease	Yes	No	Colonization	NA	Dead
145	2015-08-18	Urine	Klebsiella pneumoniae	OXA 48	35, 36, 37	8	16	0.5	63	Female	Chinese	10	Maglinancy, infection	Yes	No	Colonization	NA	Alive
146	2015-08-03	Latex A fluid swab	Klebsiella pneumoniae	OXA 48, NDM	35, 36, 37	4	0.5	16	47	Male	Other	57	Liver disease, infection	Yes	Yes	Infection	≤3	Alive
150	2015-08-17	Pus swab	Klebsiella pneumoniae	OXA 48	35, 36, 37	2	16	0.5	72	Male	Chinese	18	Liver disease	Yes	Yes	Infection	≤3	Alive
151	2015-08-20	Bronchoalveolar fluid	Serratia marcescens	OXA 48	NA	8	4	16	49	Female	Chinese	95	ESRF/kidney disease, infection	Yes	Yes	Infection	>3	Dead
152	2015-09-01	Tracheal secretion	Klebsiella pneumoniae	OXA 48	35, 36, 37	8	4	0.5	NA	NA	NA	NA	NA	NA	NA	NA	NA	NA
153	2015-08-24	Blood	Klebsiella pneumoniae	OXA 48	35, 36, 37	4	1	0.5	18	Female	Malay	100	Blood disorder, infection	Yes	Yes	Infection	>3	Dead
155	2015-09-03	Sputum	Klebsiella pneumoniae	OXA 48, NDM	35, 36, 37	4	16	0.5	NA	NA	NA	NA	NA	NA	NA	NA	NA	NA
156	2015-09-03	Tracheal secretion	Klebsiella pneumoniae	OXA 48, NDM	35, 36, 37	4	0.5	0.5	46	Male	Chinese	23	HPT, ESRF/kidney disease, infection	Yes	Yes	Infection	≤3	Dead
157	2015-09-06	Tracheal secretion	Klebsiella pneumoniae	OXA 48, NDM	35, 36, 37	4	2	0.5	62	Male	Indian	102	DM, HPT, ESRF/kidney disease, heart disease	Yes	Yes	Infection	>3	Dead
158	2015-09-01	Tissue swab	Enterobacter aerogenes	OXA 48	NA	4	2	0.5	34	Male	Chinese	70	Brain disease	Yes	Yes	Infection	>3	Alive
159	2015-09-03	Pig tail aspirate swab	Klebsiella pneumoniae	OXA 48, NDM	35, 36, 37	4	16	0.5	69	Female	Chinese	53	Maglinancy, tissue disease	Yes	No	Infection	>3	Alive
160	2015-09-23	Blood	Klebsiella pneumoniae	OXA 48, NDM	35, 36, 37	2	4	0.5	NA	NA	NA	NA	NA	NA	NA	NA	NA	NA
161	2015-10-01	Sputum	Klebsiella pneumoniae	OXA 48	35, 36, 37	2	1	1	91	Male	Chinese	25	Skin disease	Yes	No	Colonization	NA	Alive
163	2015-10-05	Eye swab	Klebsiella pneumoniae	OXA 48	35, 36, 37	4	2	1	34	Male	Chinese	70	Brain disease, infection	Yes	Yes	Colonization	NA	Alive
164	2015-10-18	Urine	Escherichia coli (Ertapenem resistant)	NO GENES DETECTED	NA	0.25	0.125	0.5	75	Female	Indian	11	DM, infection	Yes	No	Infection	>3	Dead
165	2015-10-18	Blood	Klebsiella pneumoniae	OXA 48	35, 36, 37	2	8	0.5	NA	NA	NA	NA	NA	NA	NA	NA	NA	NA
166	2015-10-16	Wound swab	Escherichia coli	OXA 48, NDM	NA	64	128	1	36	Male	Malay	20	Gastrointestinal disease	Yes	No	Colonization	NA	Alive
169	2015-10-13	Fluid swab	Citrobacter freundii (Ertapenem resistant)	OXA 48, NDM	NA	0.5	0.0625	0.5	36	Female	Indian	79	DM, liver disease, ESRF/kidney disease	Yes	Yes	Infection	≤3	Alive
170	2015-10-16	Swab	Klebsiella pneumoniae	NDM	35, 36, 37	16	16	0.5	79	Female	Chinese	14	ESRF/kidney disease, infection	Yes	No	Colonization	NA	Dead
171	2015-11-20	Wound swab	Enterobacter cloacae (Ertapenem resistant)	OXA 48	NA	1	0.5	0.5	19	Male	Malay	46	Polytrauma	Yes	Yes	Colonization	NA	Alive
173	2015-11-21	Blood	Klebsiella pneumoniae (Ertapenem intermediate)	NO GENES DETECTED	35, 36, 37	1	0.5	0.5	33	Male	Other	51	Polytrauma, brain disease	Yes	Yes	Infection	>3	Alive
174	2015-11-20	Blood	Klebsiella pneumoniae	NO GENES DETECTED	36, 37	4	2	0.5	83	Female	Chinese	20	DM, HPT, ESRF/kidney disease	Yes	No	Infection	>3	Dead
175	2015-11-21	Urine	Klebsiella pneumoniae	NO GENES DETECTED	35, 37	2	0.5	1	54	Male	Malay	2	DM, HPT, infection	Yes	No	Colonization	NA	Alive
176	2015-11-24	Blood	Enterobacter cloacae	OXA 48	NA	2	0.5	1	74	Male	Chinese	33	HPT, infection, liver disease	Yes	Yes	Infection	>3	Dead
177	2015-12-09	Blood	Klebsiella pneumoniae (Ertapenem intermediate)	NO GENES DETECTED	35, 36, 37	0.5	0.5	0.5	NA	NA	NA	NA	NA	NA	NA	NA	NA	NA
178	2015-12-09	Blood	Klebsiella pneumoniae (Ertapenem intermediate)	NO GENES DETECTED	35, 36, 37	0.5	0.5	0.5	67	Male	Chinese	11	DM, ESRF/kidney disease, neurological disease, blood disorder, infection, endocrine/metabolite disease	Yes	No	Infection	>3	Dead
179	2015-12-07	Blood	Klebsiella pneumoniae (Ertapenem resistant)	OXA 48	35, 36	0.5	0.125	0.5	60	Male	Malay	34	DM, HPT, maglinancy, ESRF/kidney disease, infection	Yes	Yes	Infection	≤3	Dead
180	2015-09-12	Urine	Klebsiella pneumoniae (Ertapenem resistant)	OXA 48	35, 36, 37	0.125	0.125	1	77	Female	Chinese	36	HPT, bone/joint disease, urinary/bladder disease	Yes	No	Colonization	NA	Alive
181	2015-10-12	Urine	Klebsiella pneumoniae	OXA 48	35, 36, 37	2	8	1	73	Male	Chinese	1	Prostate disease	No	No	Colonization	NA	Alive
182	2015-10-12	Tissue swab	Escherichia coli	OXA 48	NA	2	0.5	1	59	Male	Chinese	49	DM, HPT, maglinancy, neurological disease, skin disease	Yes	No	Infection	>3	Alive
183	2015-12-07	Urine	Klebsiella pneumoniae (Ertapenem resistant)	NO GENES DETECTED	NO PORINS DETECTED	1	0.5	0.5	66	Female	Malay	51	Maglinancy, neurological disease	Yes	Yes	Infection	>3	Alive
185	2015-09-12	Rectal swab	Escherichia coli	OXA 48	NA	2	2	0.5	54	Female	Indian	14	HPT, respiratory disease, infection	Yes	Yes	Colonization	NA	Alive
186	2015-12-05	Urine	Klebsiella pneumoniae	NO GENES DETECTED	35, 36, 37	4	0.5	1	50	Male	Chinese	33	DM, bone disease, endocrine/metabolite disease, ESRF/kidney disease	Yes	No	Colonization	NA	Alive
187	2015-12-22	Tracheal secretion	Klebsiella pneumoniae	OXA 48	35, 36	2	0.125	1	56	Female	Malay	43	DM, infection, bone disease, heart disease, neurological disease, ESRF/kidney disease	Yes	Yes	Infection	≤3	Dead
188	2015-12-19	Tracheal secretion	Klebsiella pneumoniae	OXA 48, NDM	35, 36	1	4	0.5	44	Male	Chinese	44	HPT, maglinancy, infection, gastrointestinal disease	Yes	Yes	Infection	>3	Alive
189	2015-12-12	Backbone suction swab	Escherichia coli (Ertapenem intermediate)	OXA 48	NA	1	0.5	0.5	67	Male	Chinese	122	HPT, endocrine/metabolite disease, infection, skin disease, blood disorder, neurological disease	Yes	Yes	Infection	>3	Alive
190	2015-12-12	Backbone suction swab	Klebsiella pneumoniae	OXA 48, NDM	35, 36, 37	2	2	0.5	67	Male	Chinese	122	HPT, endocrine/metabolite disease, infection, skin disease, blood disorder, neurological disease	Yes	Yes	Infection	>3	Alive
191	2015-12-15	Urine	Klebsiella pneumoniae (Ertapenem resistant)	NO GENES DETECTED	35, 36, 37	1	0.5	0.5	73	Male	Chinese	32	HPT, ESRF/kidney disease, bone/joint disease, infection	Yes	No	Infection	>3	Alive
B1	2014-01-15	Sacral swab	Klebsiella pneumoniae	NDM	35, 36, 37	32	128	1	23	Male	Malay	60	HPT, brain disease	Yes	Yes	Colonization	NA	Alive
B10	2014-04-20	Urine	Klebsiella pneumoniae	NO GENES DETECTED	35, 36, 37	0.5	2	1	63	Female	Indian	19	HPT, maglinancy, bone/joint disease	Yes	No	Infection	>3	Alive
B11	2014-05-12	Nasopharyngeal secretion	Enterobacter cloacae	NDM	NA	1	8	0.5	1	Female	Other	10	Respiratory disease, blood disorder	Yes	No	Infection	>3	Dead
B12	2014-05-29	Stoma swab	Enterobacter cloacae	NO GENES DETECTED	NA	4	8	0.5	2	Female	Malay	14	Gastrointestinal disease, blood disorder, immune disease	Yes	Yes	Colonization	NA	Dead
B14	2014-05-13	Tracheal secretion	Enterobacter cloacae	NO GENES DETECTED	NA	2	2	0.5	NA	NA	NA	NA	NA	NA	NA	NA	NA	NA
B15	2014-07-02	Urine	Citrobacter freundii	NDM	NA	16	128	0.5	75	Male	Chinese	8	DM, HPT, endocrine/metabolite disease, infection	Yes	No	Colonization	NA	Alive
B3	2014-02-15	Pus	Klebsiella pneumoniae	OXA 48	35, 37	4	2	0.5	NA	NA	NA	NA	NA	NA	NA	NA	NA	NA
B4	2014-02-21	Groin swab	Klebsiella pneumoniae	NO GENES DETECTED	35, 37	1	4	1	1	Male	Indian	13	Heart disease, infection	Yes	Yes	Colonization	NA	Alive
B5	2014-03-10	Blood	Klebsiella pneumoniae	NO GENES DETECTED	35, 37	0.5	4	1	78	Female	Chinese	73	HPT, ESRF/kidney disease, infection	Yes	No	Infection	>3	Alive
B6	2014-04-07	Sputum	Klebsiella pneumoniae	NDM	35, 36, 37	16	128	0.5	75	Male	Chinese	27	DM, HPT, infection, neurological disease, brain disease	Yes	No	Infection	>3	Dead
B7	2014-04-10	Urine	Klebsiella pneumoniae	NDM	35, 36, 37	32	256	0.5	58	Male	Indian	10	HPT, DM, infection, urinary/bladder disease	Yes	No	Colonization	NA	Alive
B8	2014-04-13	Blood	Escherichia coli	OXA 48	NA	2	1	0.5	30	Male	Other	138	Gastrointestinal disease	Yes	Yes	Infection	>3	Alive
B9	2014-04-14	Blood	Klebsiella pneumoniae	OXA 48	35, 36, 37	2	2	0.5	30	Male	Other	138	Gastrointestinal disease	Yes	Yes	Infection	>3	Alive
